# Supplementary material
Source: PubMed Central journal article supplement (PMC4666024)

$^1\text{H}$  NMR assignments for representative compounds **6g** and **13g**

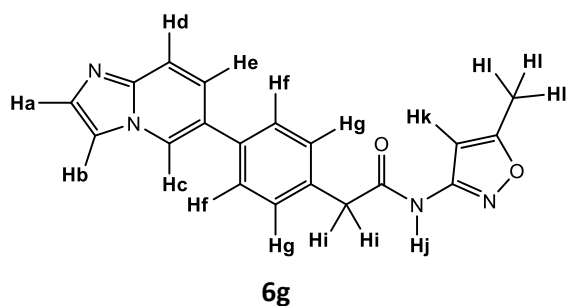

$^1\text{H}$  NMR (400 MHz,  $\text{CDCl}_3$ )  $\delta$  9.83 (s, 1H, **Hj**), 8.29 (s, 1H, **Hc**), 7.70 (m, 2H, **Hd**, **Hb**), 7.64 (s, 1H, **Ha**), 7.53 (d,  $J = 7.6$  Hz, 2H, **Hg**), 7.45 (d,  $J = 7.6$  Hz, 2H, **Hf**), 7.40 (d,  $J = 9.4$  Hz, 1H, **He**), 6.76 (s, 1H, **Hk**), 3.84 (s, 2H, **Hi**), 1.35 (s, 9H, **Hi**).

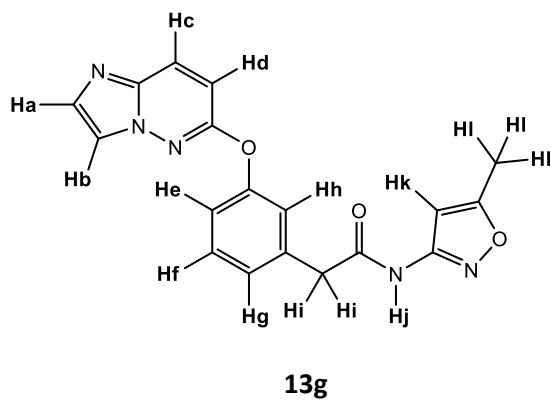

$^1\text{H}$  NMR (400 MHz,  $\text{CDCl}_3$ )  $\delta$  9.70 (s, 1H, **Hj**), 7.93 (d,  $J = 9.6$  Hz, 1H, **Hc**), 7.70 (s, 1H, **Hb**), 7.63 (s, 1H, **Ha**), 7.42 (t,  $J = 8.0$  Hz, 1H, **Hf**), 7.30–7.24 (m, 2H, **He**, **Hh**), 7.16 (dd,  $J = 8.0, 2.2$  Hz, 1H, **Hg**), 6.87 (d,  $J = 9.6$  Hz, 1H, **Hd**), 6.72 (s, 1H, **Hk**), 3.81 (s, 2H, **Hi**), 1.31 (s, 9H, **Hi**).

# $^1\text{H}$ and $^{13}\text{C}$ NMR Spectra for Compound 6a

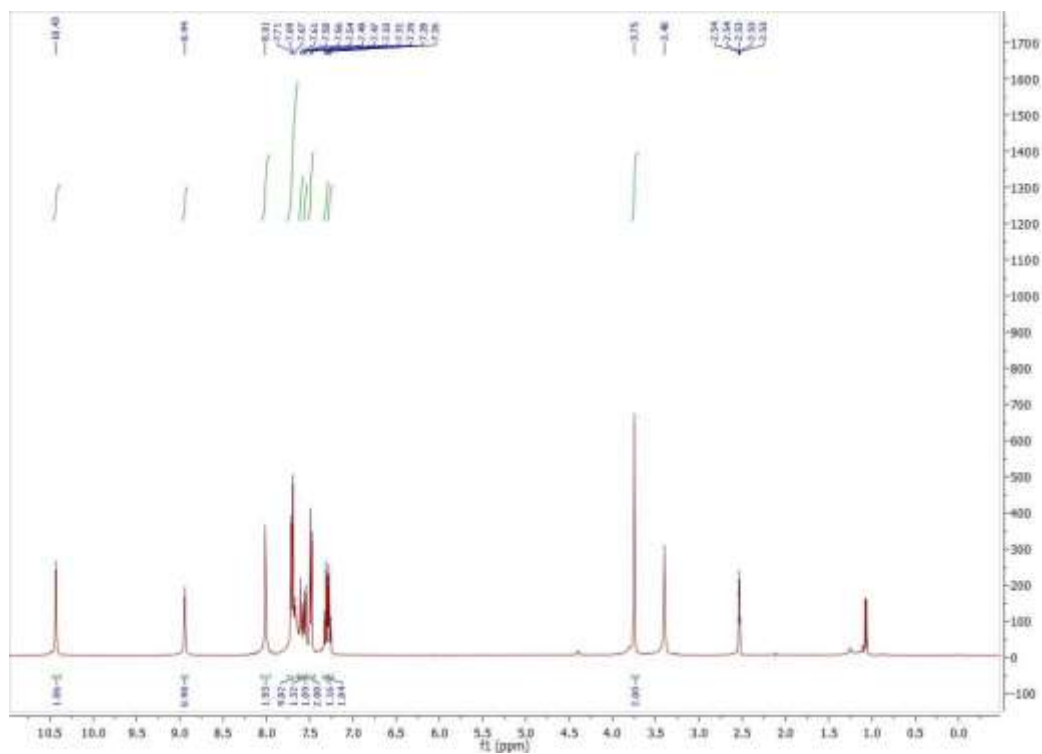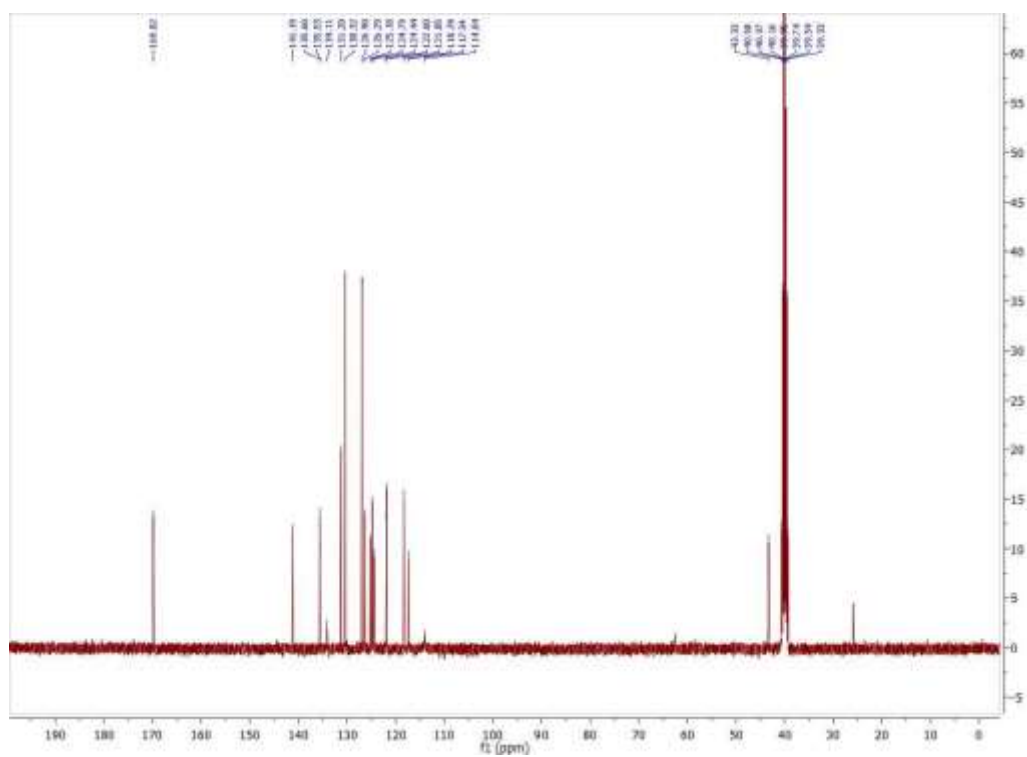





$^1\text{H}$  and  $^{13}\text{C}$  NMR Spectra for Compound **6d**

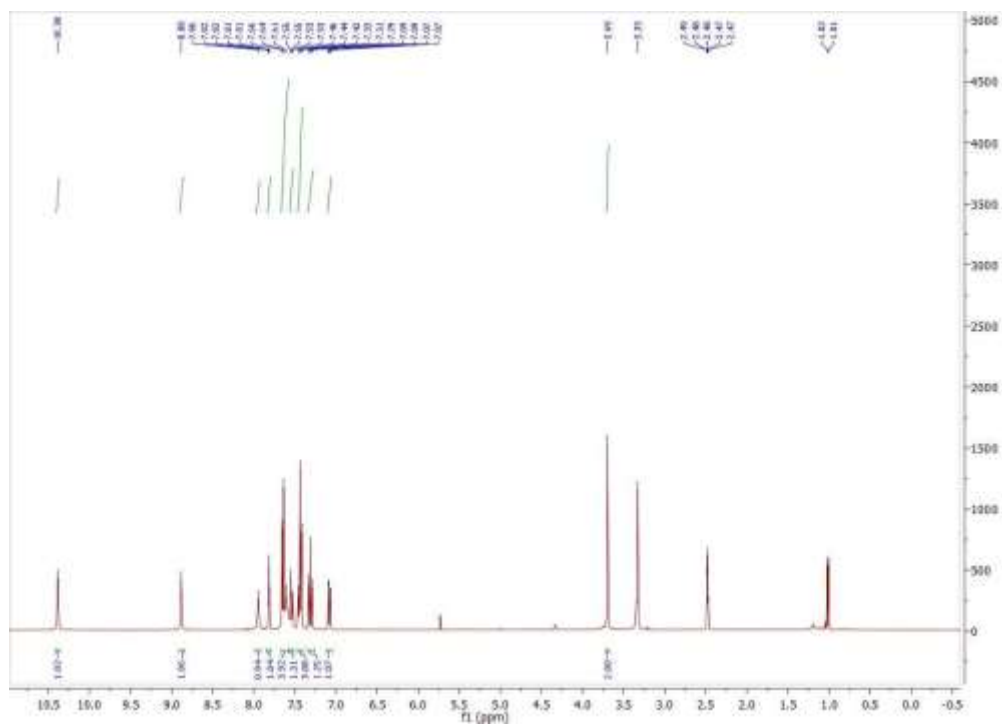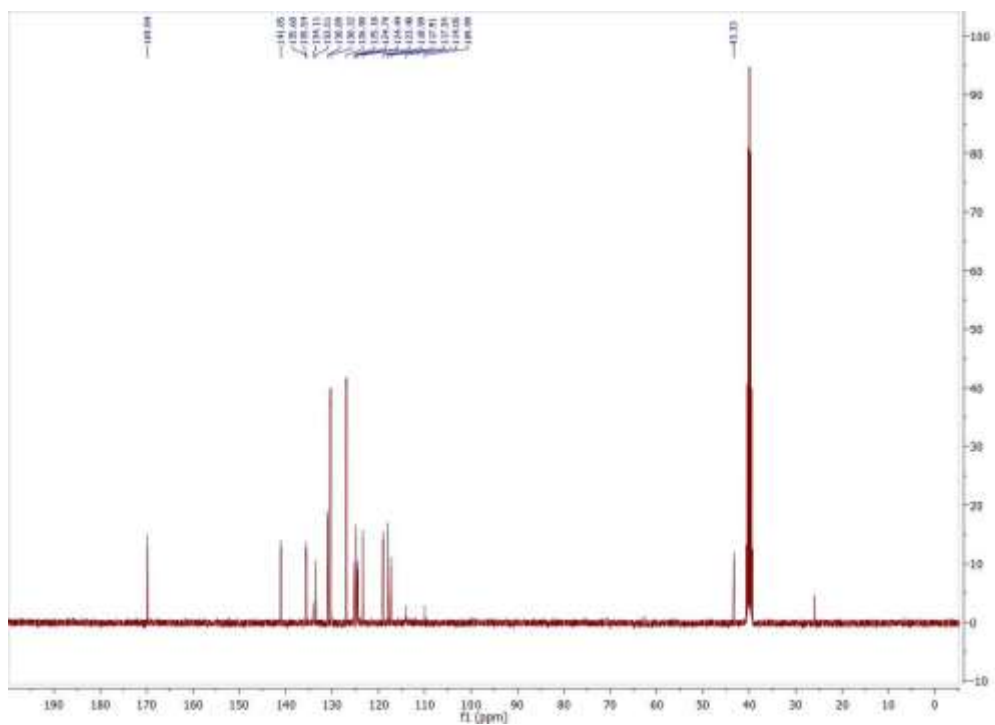









<sup>1</sup>H and <sup>13</sup>C NMR Spectra for Compound **13a**

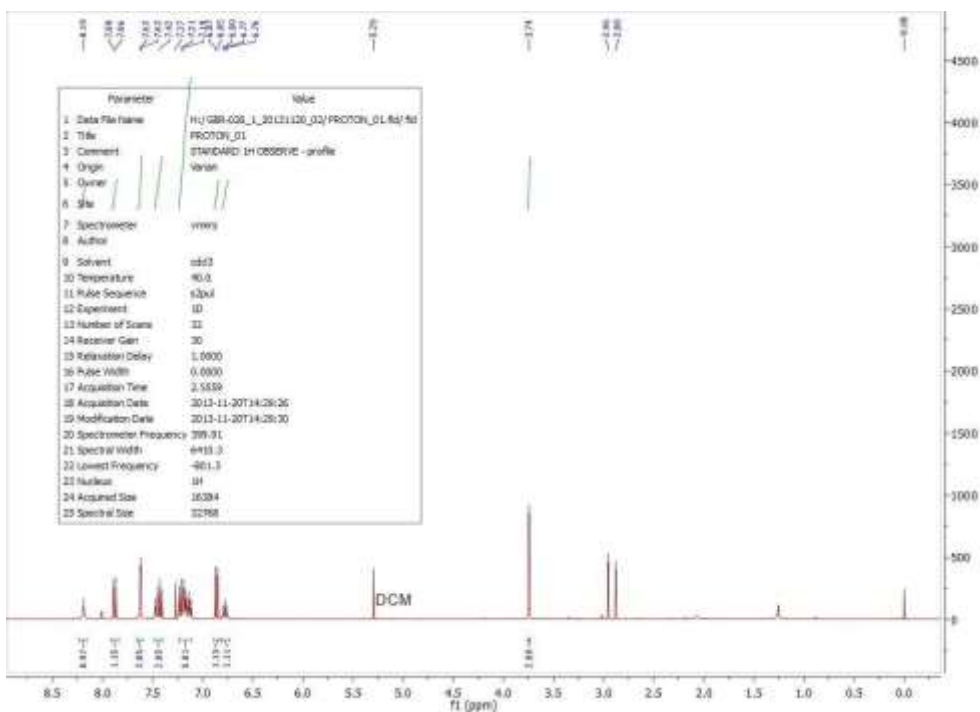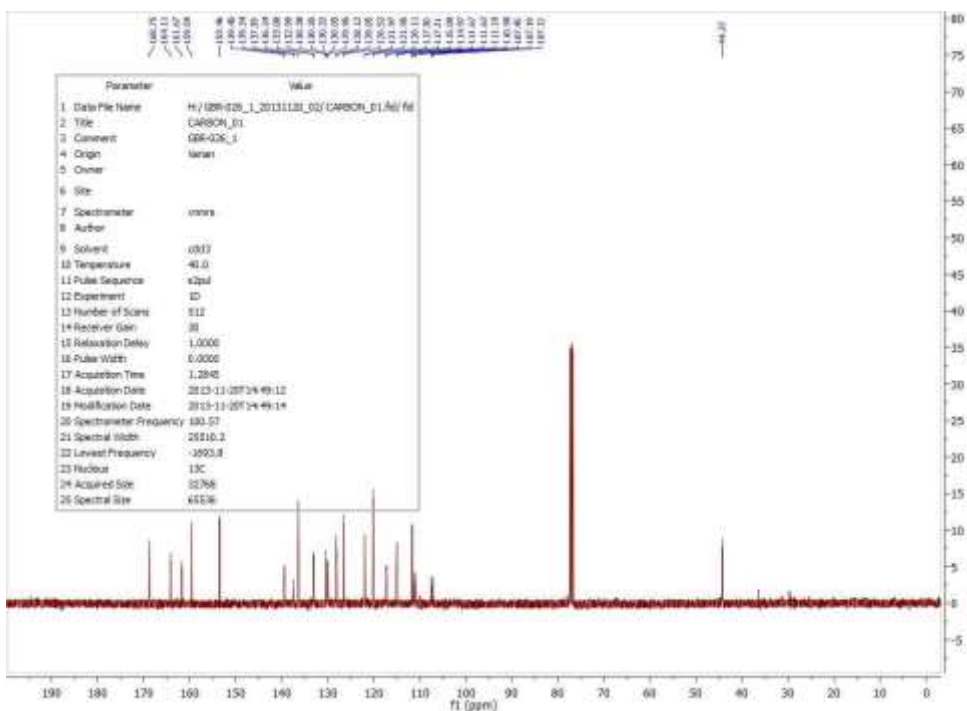



$^1\text{H}$  and  $^{13}\text{C}$  NMR Spectra for Compound **13c**

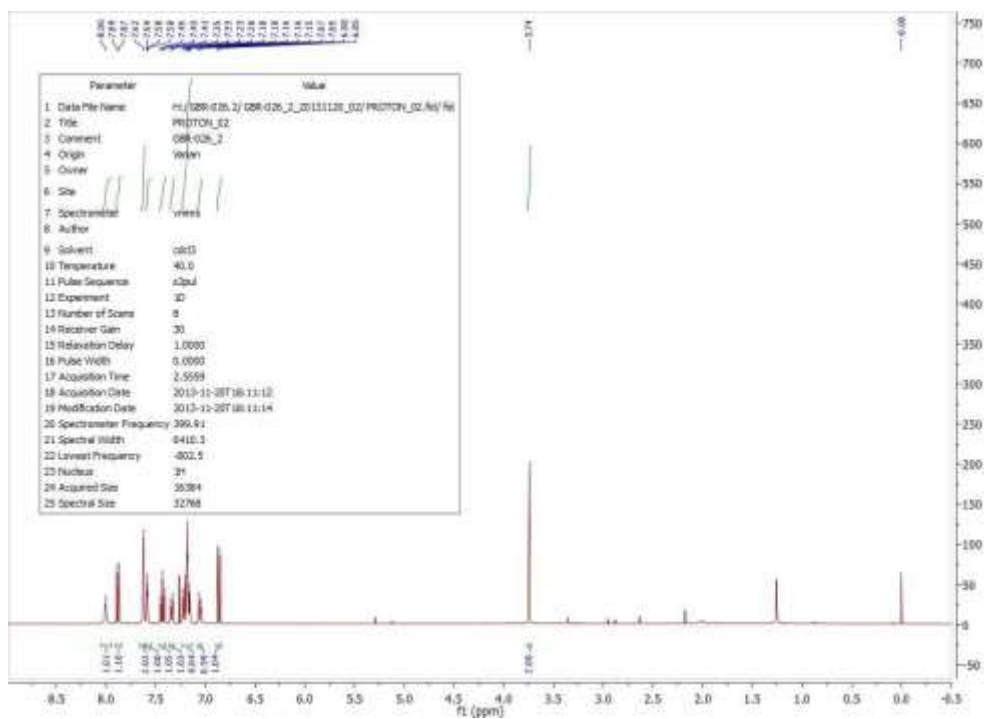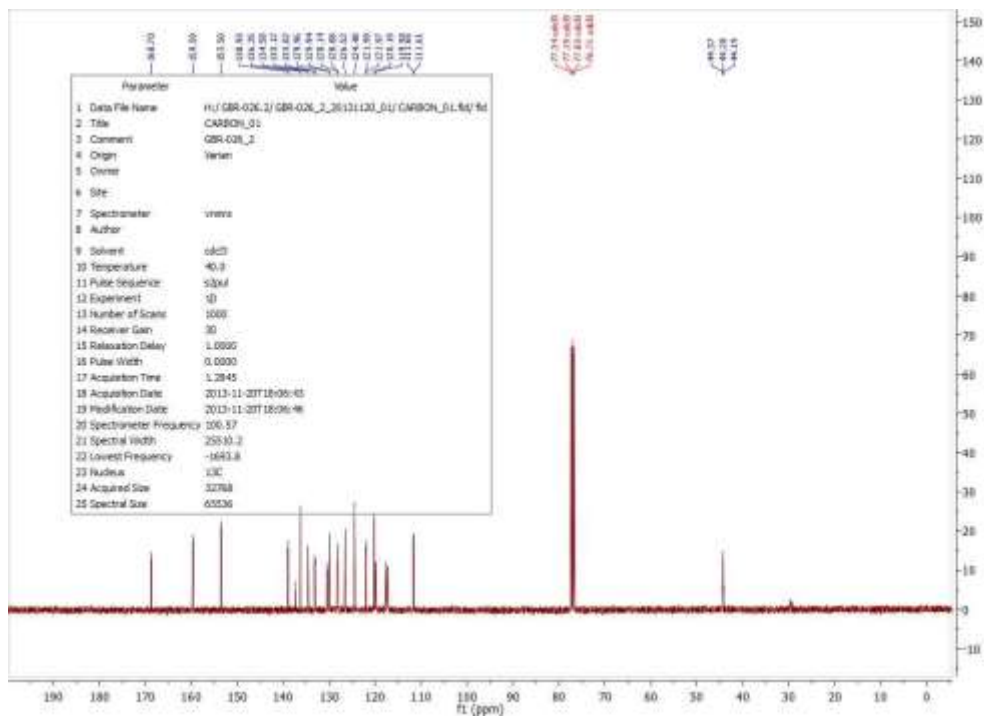

<sup>1</sup>H and <sup>13</sup>C NMR Spectra for Compound **13d**

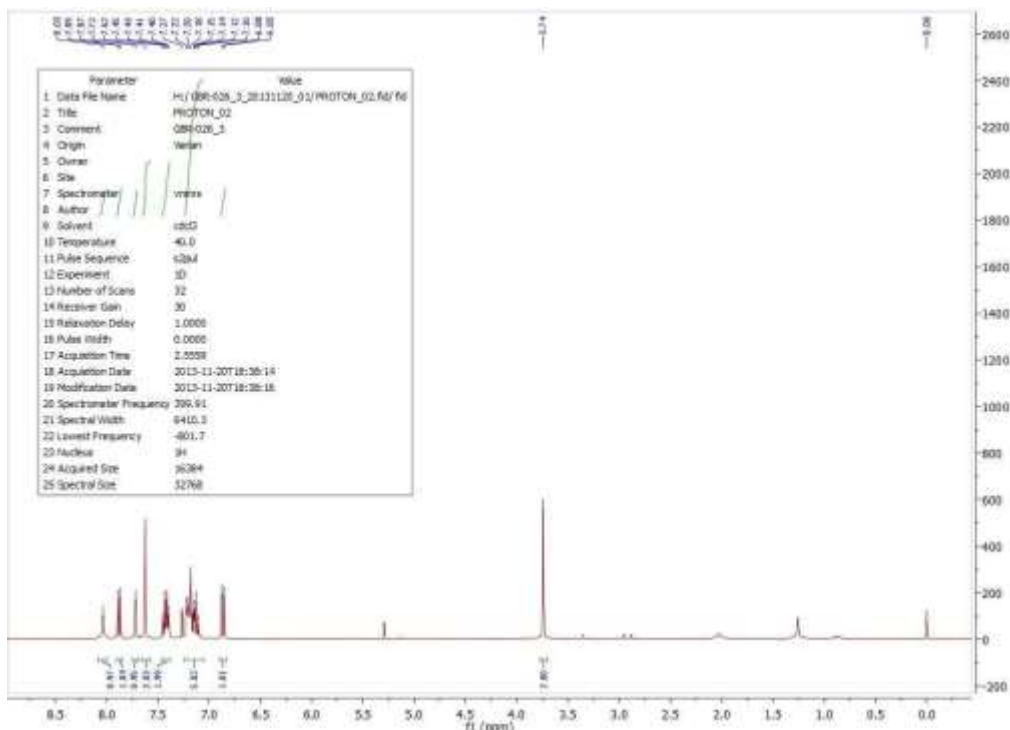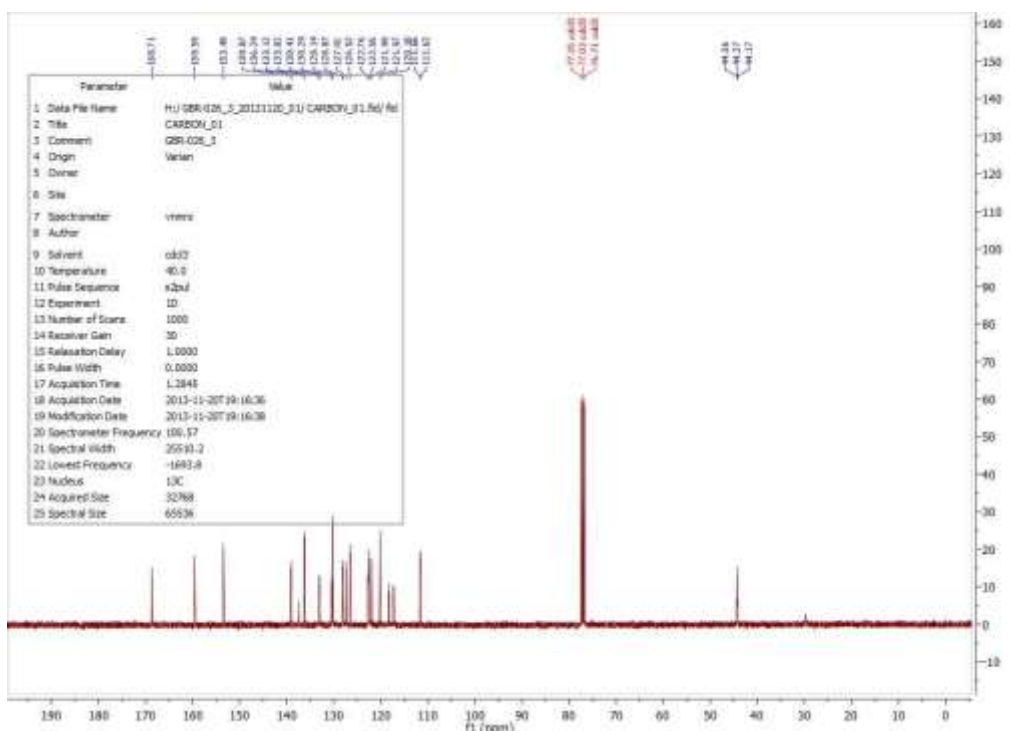

$^1\text{H}$  and  $^{13}\text{C}$  NMR Spectra for Compound **13e**

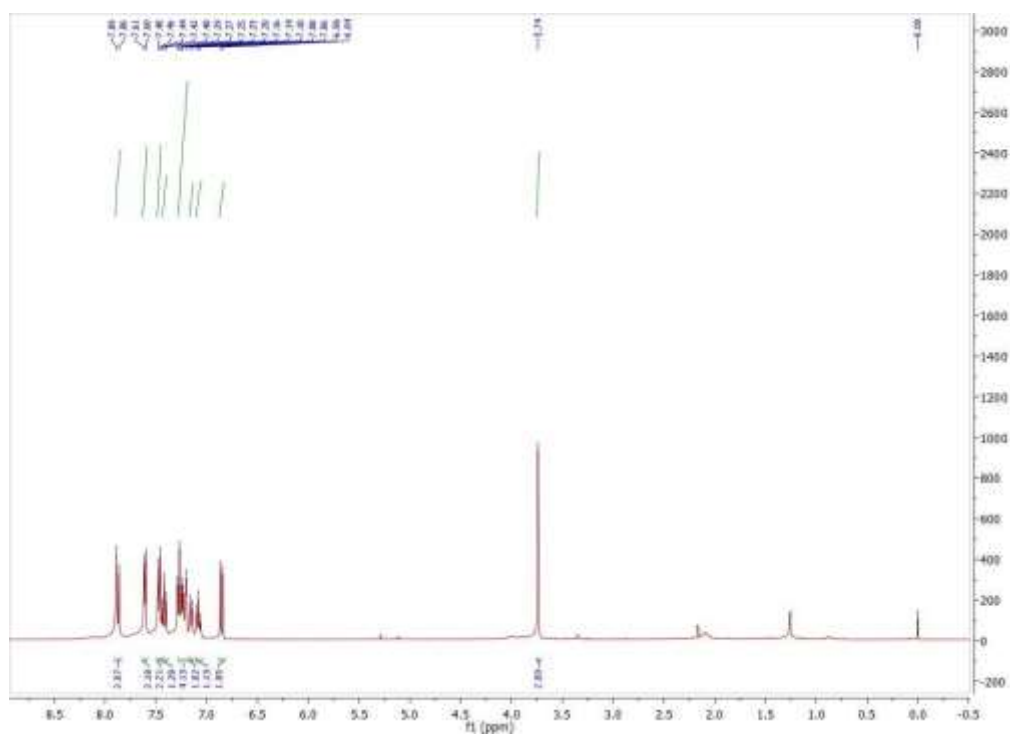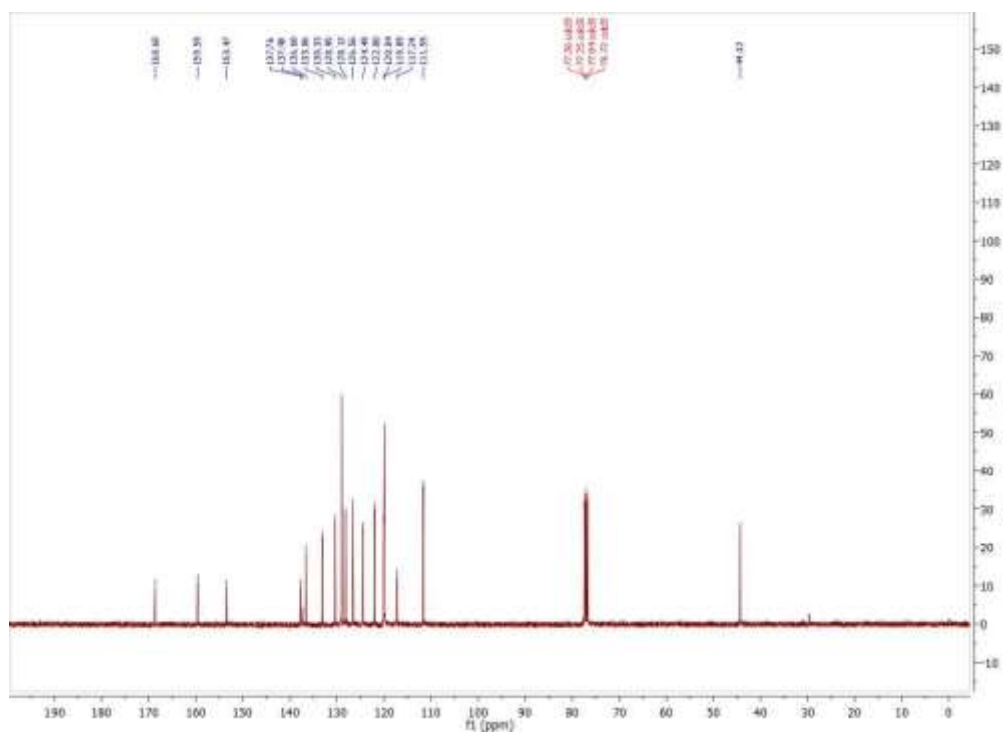

# $^1\text{H}$ and $^{13}\text{C}$ NMR Spectra for Compound **13f**

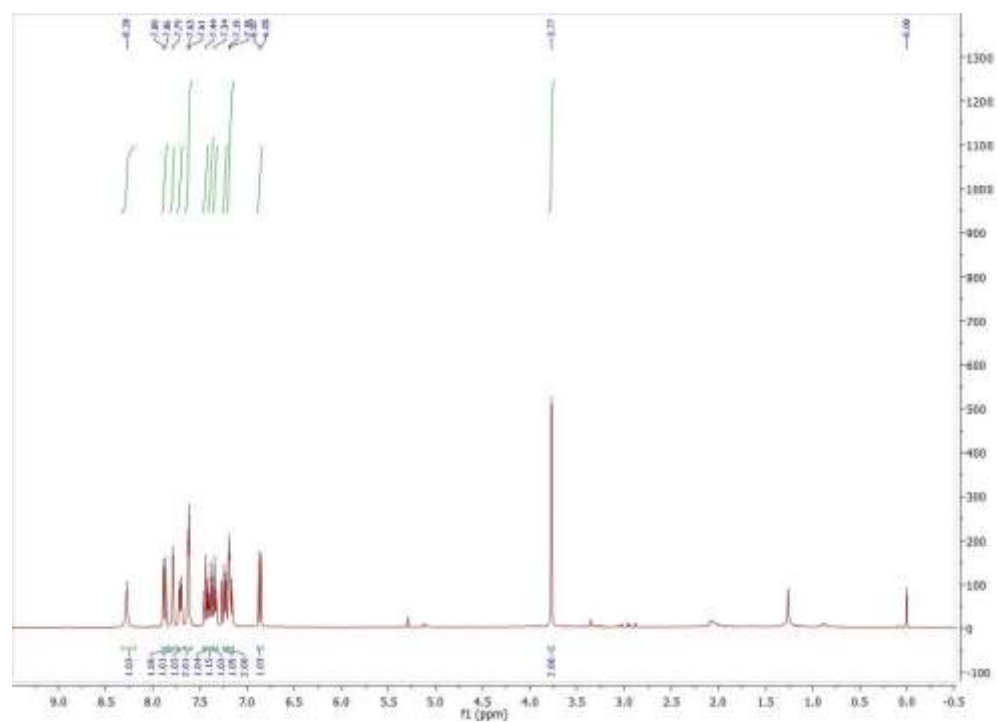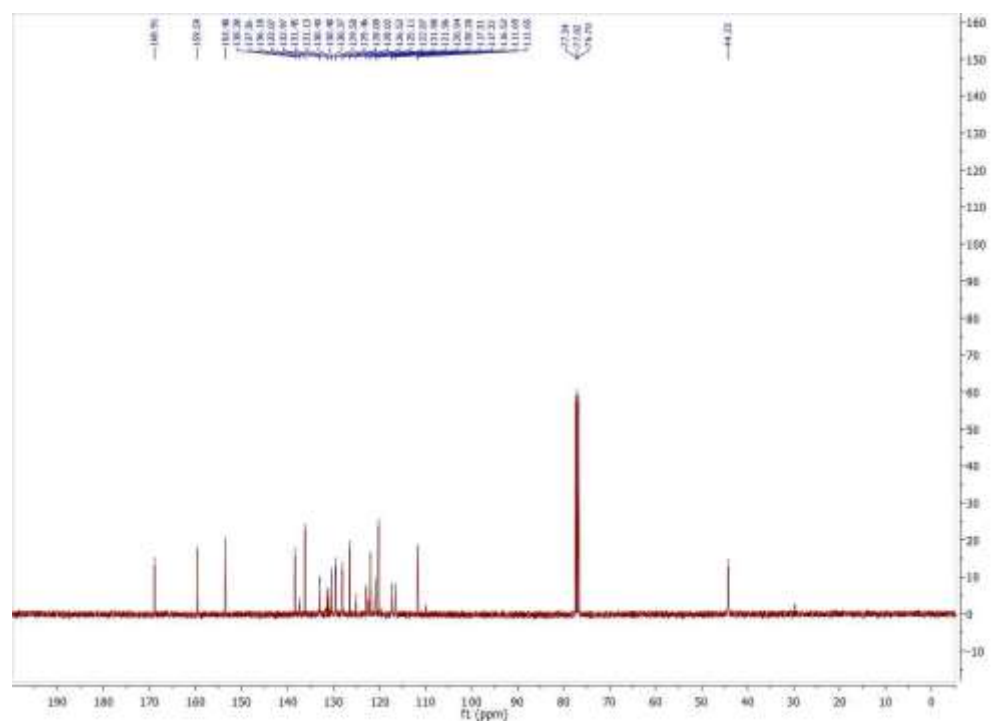

<sup>1</sup>H and <sup>13</sup>C NMR Spectra for Compound **13g**

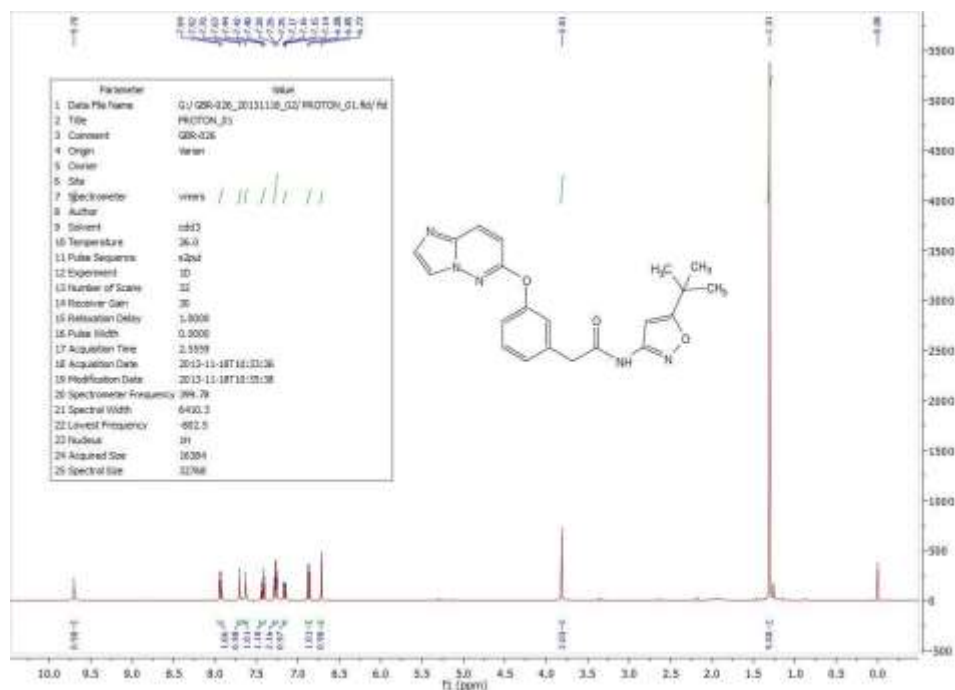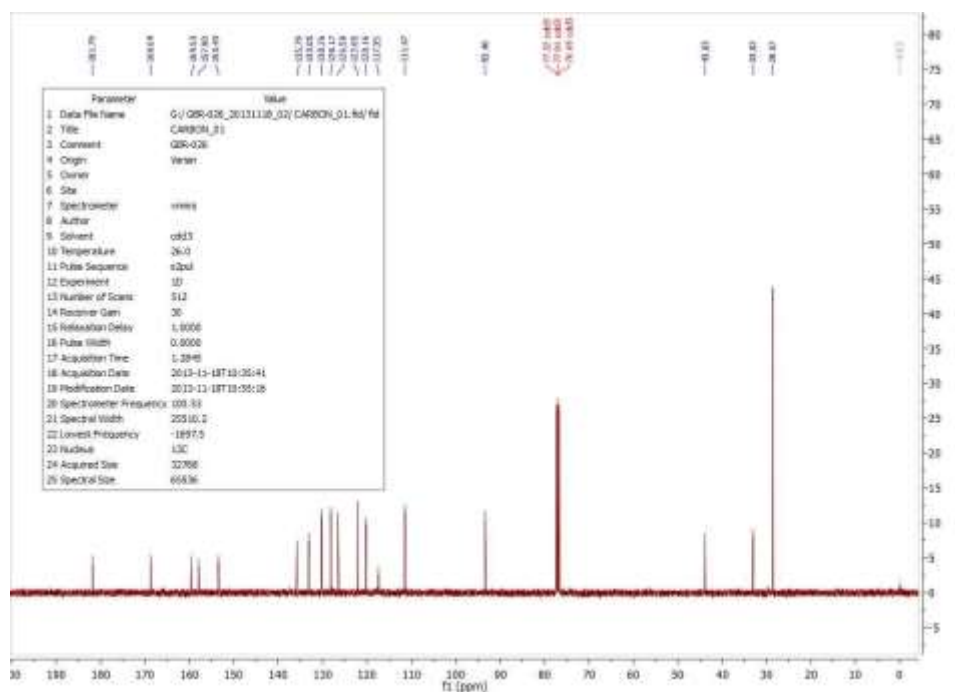

Supplement: NIHMS739083-supplement-Supplemental.pdf [file NIHMS739083-supplement-Supplemental.pdf]
